# 1 **Cross-trial prediction of treatment response to transcranial direct current** 2 **stimulation in patients with major depressive disorder**

3 Gerrit Burkhardt, MD<sup>1,2</sup>; Stephan Goerigk, PhD<sup>1,2,3</sup>; Lucia Bulubas, MD, PhD<sup>1,2</sup>; Esther Dechantsreiter,  
4 M.Sc.<sup>1,2</sup>; Daniel Keeser, PhD<sup>1,2</sup>; Ulrike Vogelmann, MD<sup>2,4</sup>; Katharina von Wartensleben<sup>1</sup>; Johannes  
5 Wolf, MD<sup>1,2</sup>; Christian Plewnia, MD<sup>5,6</sup>; Andreas Fallgatter, MD<sup>5,6</sup>; Berthold Langguth, MD<sup>7</sup>; Claus  
6 Normann, MD<sup>8,9</sup>; Lukas Frase, MD<sup>8,10</sup>; Peter Zwanzger, MD<sup>1,11</sup>; Thomas Kammer, MD<sup>12,13</sup>; Carlos  
7 Schönfeldt-Lecuona, MD<sup>12,13</sup>; Daniel Kamp, MD<sup>14</sup>; Malek Bajbouj, MD<sup>15,16</sup>; Nikolaos Koutsouleris,  
8 MD<sup>1,2</sup>; Andre R Brunoni, MD, PhD<sup>17,\*</sup>; Frank Padberg, MD<sup>1,2,\*</sup>

9

10 <sup>1</sup>Department of Psychiatry and Psychotherapy, LMU University Hospital, Munich, Germany

11 <sup>2</sup>German Center for Mental Health (DZPG), Site Munich-Augsburg, Germany

12 <sup>3</sup>Charlotte Fresenius Hochschule, University of Psychology, Munich, Germany

13 <sup>4</sup>Department of Psychiatry and Psychotherapy, University Hospital, Technical University of Munich  
14 (TUM), Munich, Germany

15 <sup>5</sup>Tübingen Center for Mental Health, Department of Psychiatry and Psychotherapy, University of  
16 Tübingen, Tübingen, Germany

17 <sup>6</sup>German Center for Mental Health (DZPG), Site Tübingen, Germany

18 <sup>7</sup>Department of Psychiatry and Psychotherapy, University of Regensburg, Regensburg, Germany

19 <sup>8</sup>Department of Psychiatry and Psychotherapy, Medical Center, University of Freiburg, Freiburg,  
20 Germany

21 <sup>9</sup>Center for Basics in Neuromodulation (NeuroModulBasics), University of Freiburg, Freiburg,  
22 Germany

23 <sup>10</sup>Department of Psychosomatic Medicine and Psychotherapy, Medical Center, University of Freiburg

24 <sup>11</sup>kbo-Inn-Salzach-Klinikum, Clinical Center for Psychiatry, Psychotherapy, Psychosomatic Medicine,  
25 Geriatrics and Neurology, Gabersee, Wasserburg/Inn, Germany

26 <sup>12</sup>Department of Psychiatry and Psychotherapy III, University of Ulm, Ulm, Germany

27 <sup>13</sup>German Center for Mental Health (DZPG), Site Mannheim-Heidelberg-Ulm, Germany

28 <sup>14</sup>Department of Psychiatry and Psychotherapy, LVR-Klinikum Düsseldorf, Heinrich-Heine-  
29 Universität Düsseldorf, Medical Faculty, Düsseldorf, Germany

30 <sup>15</sup>Department of Psychiatry and Psychotherapy, Charité-Campus Benjamin Franklin, Berlin, Germany

31 <sup>16</sup>German Center for Mental Health (DZPG), Site Berlin-Potsdam, Germany

32 <sup>17</sup>Department of Psychiatry, University of São Paulo Medical School, São Paulo, Brazil

33 \* These authors equally contributed to the manuscript

34

35 Corresponding author:

36 Dr. Gerrit Burkhardt

37 Department of Psychiatry and Psychotherapy

38 LMU University Hospital

39 Nußbaumstraße 7

40 80336 Munich, Germany

41 E-Mail: [gerrit.burkhardt@med.uni-muenchen.de](mailto:gerrit.burkhardt@med.uni-muenchen.de)

42 Telephone: +1149 89 4400 53381

43

44 Running title: Cross-trial prediction of tDCS response in MDD

## 45 **Abstract**

46 Machine-learning (ML) classification may offer a promising approach for treatment response  
47 prediction in patients with major depressive disorder (MDD) undergoing non-invasive brain  
48 stimulation. This analysis aims to develop and validate such classification models based on easily  
49 attainable sociodemographic and clinical information across two randomized controlled trials on  
50 transcranial direct-current stimulation (tDCS) in MDD. Using data from 246 patients with MDD from  
51 the randomized-controlled DepressionDC and ELECT-TDCS trials, we employed an ensemble  
52 machine learning strategy to predict treatment response to either active tDCS or sham tDCS/placebo,  
53 defined as  $\geq 50\%$  reduction in the Montgomery-Åsberg Depression Rating Scale at 6 weeks. Separate  
54 models for active tDCS and sham/placebo were developed in each trial and evaluated for external  
55 validity across trials and for treatment specificity across modalities. Additionally, models with above-  
56 chance detection rates were associated with long-term outcomes to assess their clinical validity. In the  
57 DepressionDC trial, models achieved a balanced accuracy of 63.5% for active tDCS and 62.5% for  
58 sham tDCS in predicting treatment responders. The tDCS model significantly predicted MADRS  
59 scores at the 18-week follow-up visit ( $F_{(1,60)} = 4.53$ ,  $p_{FDR} = .037$ ,  $R^2 = 0.069$ ). Baseline self-rated  
60 depression was consistently ranked as the most informative feature. However, response prediction in  
61 the ELECT-TDCS trial and across trials was not successful. Our findings indicate that ML-based  
62 models have the potential to identify responders to active and sham tDCS treatments in patients with  
63 MDD. However, to establish their clinical utility, they require further refinement and external  
64 validation in larger samples and with more features.

65

66

67

68

69

70

71

## 72 **Introduction**

73 Major Depressive Disorder (MDD) represents a significant global health challenge, ranking as one of  
74 the main causes of disability worldwide<sup>1</sup>. Despite the availability of effective treatments ranging from  
75 pharmacotherapy and psychotherapy to non-invasive and invasive neurostimulation, many patients do  
76 not achieve remission, even after multiple therapeutic attempts<sup>2</sup>. The development of new  
77 interventions has proven challenging, possibly due to the heterogeneity of MDD symptoms<sup>3</sup>, its  
78 varying time course<sup>4</sup>, and a lack of robust biological correlates<sup>5,6</sup>. While multiple sociodemographic,  
79 clinical, genetic, and neuroimaging variables have been associated with responses to common  
80 treatments like antidepressant medication<sup>7</sup>, these associations have not yet resulted in stratified patient  
81 selection algorithms or targeted interventions. Thus, recent research has focused on developing  
82 multivariate predictive models that might enable pre-treatment stratification at the individual patient  
83 level<sup>8,9</sup> and detect effects beyond the between-group level in randomized controlled trials (RCT)<sup>9,10</sup>.  
84 Within this approach, initial machine learning (ML)-based predictive models are typically trained on  
85 data from existing RCTs to identify responders to the treatments under investigation<sup>8,11,12</sup>. Models  
86 then require testing in independent samples and across diverse populations to ensure their  
87 generalizability to unseen patients before they are finally tested prospectively for clinical utility.  
88 However, efforts to externally validate initial models remain sparse<sup>13</sup>, and consequently, few attempts  
89 have been made to validate treatment prediction models in RCTs<sup>14</sup>.

90 Predictive approaches are particularly relevant in the field of non-invasive brain stimulation  
91 (NIBS), including repetitive transcranial magnetic stimulation (rTMS) and transcranial direct current  
92 stimulation (tDCS), as the clinical application of these interventions is rapidly growing. tDCS is a  
93 safe, well-tolerated, and easily applicable treatment option for patients with MDD<sup>15-17</sup>, but has yielded  
94 inconclusive results in recent confirmatory multicenter RCTs<sup>18-20</sup>. Therefore, efforts to optimize  
95 outcomes on the individual patient level are required to develop the intervention toward clinical  
96 applicability<sup>21,22</sup>. A recent study reported a high predictive accuracy of an ML-based prediction model  
97 for identifying responders to bifrontal transcranial direct current stimulation (tDCS), yet lacked  
98 external validation<sup>23</sup>. For rTMS, ML studies have mainly focused on other neuropsychiatric

99 conditions, e.g. schizophrenia<sup>9,10</sup>. To our knowledge, there are currently no studies available utilizing  
100 ML models across RCTs on NIBS interventions.

101 To investigate whether sociodemographic and clinical data are informative for predicting the  
102 individual response to tDCS, we used data from two large RCTs on basically identical tDCS protocols  
103 (i.e. bifrontal electrode montage: anode left and cathode right dorsolateral prefrontal cortex [DLPFC],  
104 2 mA intensity and 30 min duration), that were performed in Brazil<sup>16</sup> and Germany<sup>18</sup>, evaluating the  
105 efficacy of tDCS in patients with MDD. We aimed to develop and externally validate ML-based  
106 prediction models to identify patients likely to benefit from tDCS, test those models for treatment  
107 specificity, and explore their clinical validity and utility based on long-term outcomes.

108

## 109 **Subjects and Methods**

### 110 **Study design**

111 In this secondary analysis of two randomized, blinded, sham-controlled trials, we used an ensemble  
112 ML-based strategy with nested cross-validation to identify patients with response to either active  
113 tDCS or sham/placebo treatment using sociodemographic and clinical baseline variables. Models  
114 were trained separately in each trial for each treatment modality and then applied 1.) across trials to  
115 test for external validity and 2.) across treatment modalities to test if predictions were specific to the  
116 treatment (see Figure 1). Classification probabilities of models with above-chance detection rates  
117 were then associated with long-term outcomes at follow-up to explore the clinical validity and utility  
118 of the predictions.

119

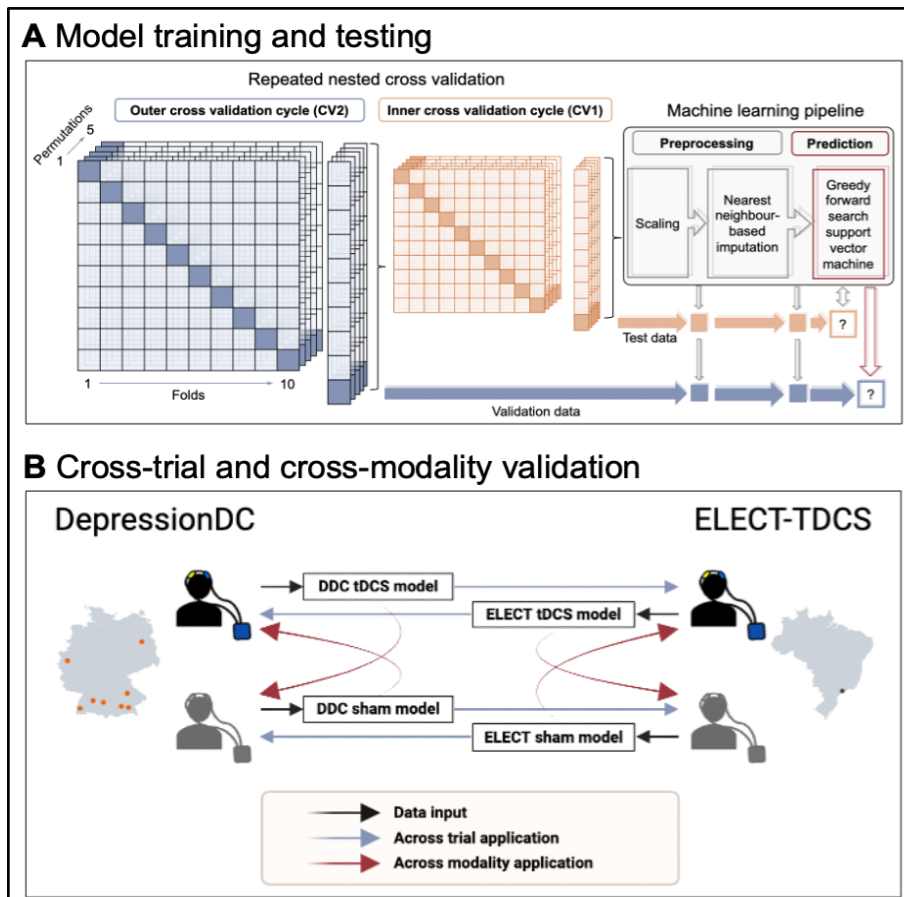

120

121 **Figure 1.** Model development and validation

122

### 123 Study population

124 We analyzed patients with MDD from two trials: 1.) DepressionDC (trial registration: NCT02530164)

125 was a multicenter RCT investigating the efficacy of 6 weeks of bifrontal tDCS as an additional

126 treatment to selective serotonin reuptake inhibitors (SSRI) in patients with MDD<sup>18</sup>. Between January

127 2016 and June 2020, 160 patients were recruited at seven university hospitals and one psychiatric

128 community hospital in Germany. Active tDCS was not superior to sham tDCS in reducing depressive

129 symptoms. 2.) The Escitalopram versus Electrical Current Therapy for Treating Depression Clinical

130 Study (ELECT-TDCS; trial registration: NCT01894815) was a single-center, non-inferiority RCT

131 comparing active tDCS plus placebo medication, escitalopram plus sham tDCS, and sham tDCS plus

132 placebo medication in patients with MDD over 10 weeks<sup>16</sup>. Two hundred forty-five patients were

133 recruited at the University of São Paulo, Brazil, between October 2013 through July 2016. Active

134 tDCS was not non-inferior to escitalopram but superior to placebo treatment.

135 Both trials employed rigorous RCT methods with stringent randomization, blinding protocols,  
136 and non-active sham conditions. Participants were selected based on the DSM-5 criteria for MDD  
137 while excluding patients with bipolar disorder, substance abuse or dependence, dementia, and  
138 personality disorders. However, DepressionDC enrolled patients currently receiving SSRIs, whereas  
139 ELECT-TDCS required participants to be antidepressant-free. Furthermore, DepressionDC permitted  
140 the inclusion of patients with marginally lower symptom severity, as assessed by the Hamilton  
141 Depression Rating Scale (HDRS), and restricted participation to a narrower age range. A  
142 comprehensive list of eligibility criteria for both trials is provided in the supplement.

143 The intervention followed a basically identical tDCS protocol with 2 mA stimulation of the  
144 DLPFC over 30 minutes per session. However, protocols differed in precise electrode placement, i.e.  
145 DepressionDC using the F3 (anode) and F4 (cathode) based on the international  
146 electroencephalogram 10-20 system, and ELECT-TDCS the Omni-Lateral-Electrode (OLE) system  
147 (left DLPFC anode and right DLPFC cathode) with slightly more lateral positions of electrodes<sup>24</sup>.  
148 Also, treatment lasted 10 weeks with a total of 22 treatment sessions (15 sessions in the first 3 weeks  
149 and 7 weekly sessions for the remaining treatment period) in ELECT-TDCS versus 6 weeks with a  
150 total of 24 treatment sessions (20 sessions in the first 4 weeks and 2 sessions per week for 2 weeks) in  
151 DepressionDC, with efficacy assessed at these time points using the HDRS and Montgomery-Åsberg  
152 Depression Rating Scale (MADRS) as primary outcome measures, respectively. Weekly MADRS  
153 scores were additionally collected in ELECT-TDCS as a secondary outcome measure.

154 We used data from all patients with available depression scores on the MADRS at baseline  
155 and week 6 after randomization. Thus, the analysis included 136 (active tDCS: 72 patients; sham  
156 tDCS: 64 patients) out of 150 patients from the DepressionDC sample and 110 (active tDCS +  
157 placebo: 66 patients; sham tDCS + placebo: 44 patients) out of 154 patients from the respective  
158 treatment arms of the ELECT-TDCS sample. All participants had provided their written informed  
159 consent before inclusion in the respective study. Both studies were approved by the local ethics  
160 committees and conducted in accordance with the Declaration of Helsinki.

161

162

## 163 **Prediction target and features**

164 Participants were classified as treatment responders if they achieved a  $\geq 50\%$  reduction from baseline  
165 to week 6 on the 10-item MADRS (score range 0-60; higher scores indicate more severe  
166 depression)<sup>25</sup>. Pursuing a data-driven approach, we included all variables available across the studies  
167 at baseline as potential predictors. This amounted to 15 features, including basic sociodemographic  
168 information (age, sex, years of education, marriage, unemployment), medical history (body mass  
169 index, smoker status, diagnoses of hypertension, diabetes, and/or hypothyroidism), psychiatric history  
170 (age of MDD onset, duration of MDD episode, family history of MDD), and baseline depression  
171 severity (MADRS and Beck Depression Inventory-II [BDI-II] total scores).

172

## 173 **Machine learning analysis**

174 All ML analyses were conducted using the in-house, open-source software package  
175 NeuroMiner, version 1.05 (<https://github.com/neurominer-git/NeuroMiner-1>), running on MATLAB  
176 (version R2022a). We used repeated nested cross-validation (CV) with 10 folds and 5 repetitions at  
177 both the inner (CV<sub>1</sub>) and outer (CV<sub>2</sub>) loops to strictly separate the training and testing of the models.  
178 In each CV<sub>1</sub> fold, we scaled all features from 0 to 1 and substituted missing values via 7-nearest  
179 neighbor-based imputation (Euclidean distance for continuous, Hamming distance for categorical  
180 variables)<sup>26</sup>. Following a previous approach<sup>27,28</sup>, each processed CV<sub>1</sub> training sample then entered a  
181 greedy stepwise forward search wrapper employing a linear support vector machine algorithm (SVM;  
182 LIBSVM 3.12<sup>29</sup>) to iteratively select a subset of 50% features with highest predictive performance  
183 (balanced accuracy [ $BAC = \frac{sensitivity + specificity}{2}$ ]<sup>30</sup> on the held-out CV<sub>1</sub> data) across a range of C  
184 hyperparameters ( $2^{[-4 \epsilon^Z \rightarrow +4]}$ ). To account for uneven distributions of the outcome labels  
185 (response/non-response), optimal C hyperparameters were multiplied with the inverse ratio of the  
186 training group sizes<sup>31</sup>. For each CV<sub>1</sub> permutation, all CV<sub>1</sub> models were retrained with the optimal  
187 model hyperparameters, and this ensemble was then applied to the CV<sub>2</sub> test data without modification.  
188 Classification probabilities for each CV<sub>2</sub> test subject were retrieved by combining the decisions across  
189 all models. We calculated permutation-based *p*-values to define which models reached above-chance



190 detection rates ( $\alpha=0.05$ ; 1000 permutations)<sup>32</sup>. To understand which features were most reliably  
191 contributing to the prediction of treatment response, we computed the CV ratio<sup>33</sup>. The feature  
192 importance of variables was further estimated using sign-based consistency mapping<sup>34</sup>. For cross-trial  
193 and cross-treatment modality validation, we applied CV<sub>1</sub> ensembles with permutation-based above-  
194 chance detection rates without modification to the respective other samples. Out-of-sample  
195 performance metrics were calculated by comparing the predicted versus the observed outcome labels  
196 over all CV<sub>2</sub> predictions.

197

### 198 **Post-hoc clinical validation**

199 Additional validation analyses and visualizations were performed in R, version 4.3.2<sup>35</sup>. Results were  
200 considered significant at  $\alpha=0.05$ . To explore the clinical validity of all classifiers with above-chance  
201 detection rates, we fit linear mixed models (LMM) using the lme4 package<sup>36</sup> to predict MADRS and  
202 GAF changes from baseline until the trials' follow-up appointments based on the models' assigned  
203 probability to be a responder (formula: change ~ assigned probability). The model included the  
204 treatment site as a random effect (formula: ~1| site). The significance of the model factors was  
205 determined using omnibus tests (type III ANOVA) with Satterthwaite approximation to degrees of  
206 freedom.

207

## 208 **Results**

### 209 **Main classifiers**

210 In the DepressionDC trial, 24 patients (33%) had responded to active tDCS treatment at week 6.  
211 Compared to tDCS non-responders, these patients were significantly older (mean [SD] age: 37 [13]  
212 vs. 30 [13];  $p=0.023$ ) and showed lower clinician-rated (mean [SD] MADRS scores: 22 [5] vs. 26 [6];  
213  $p=0.049$ ) and self-reported depression severity (mean [SD] BDI scores: 23 [9] vs. 30 [11];  $p=0.011$ ) at  
214 baseline (other baseline characteristics are shown in Table 1). The classifier ensemble predicted tDCS  
215 responders with an above-chance cross-validated BAC of 63.5% ( $P=0.001$ ; Table 2; Figure 2),  
216 increasing the prognostic certainty compared to the base rate (prognostic summary index of 24.1%).



217 In the sham group, 32 patients (50%) showed a treatment response. Compared to sham non-  
218 responders, these patients had lower clinician-rated (mean [SD] MADRS scores: 22 [5.3] vs. 24.3  
219 [4.4];  $p=0.017$ ) and self-reported depression severity (mean [SD] BDI scores: 23 [9] vs. 30 [10];  
220  $p=0.005$ ) at baseline. Sham responders were predicted with an above-chance cross-validated BAC of  
221 62.5% ( $p=0.023$ ; Table 2) and prognostic summary index of 25.1%. In both the tDCS and sham  
222 analyses, only baseline BDI scores reliably and significantly contributed to the classifier decisions  
223 (Figure 3).

224 In the ELECT trial, 27 patients (41%) had responded to active tDCS treatment at week 6.  
225 Compared to tDCS non-responders, they had higher clinician-rated depression at baseline (mean [SD]  
226 MADRS scores: 29 [8] vs. 26 [6];  $p=0.020$ ). Responders were predicted with a BAC of 61.0% that did  
227 not reach our above-chance detection criterion ( $p=0.071$ ; Table 2). Similarly, our analysis did not  
228 yield models with above-chance detection rates for the 14 (32%) responders to sham treatment  
229 (BAC=42.9%;  $p=0.88$ ; Table 2).

230

### 231 **External validation and treatment specificity**

232 Models with above-chance detection rates did not generalize across trials. The DepressionDC tDCS  
233 classifier showed a BAC of 51.1% in the ELECT tDCS sample, and the DepressionDC sham classifier  
234 reached a BAC of 55.5% in the ELECT sham sample (shown in Table 2). Models also did not reach  
235 above-chance detection rates across treatment modalities, with the DepressionDC tDCS model  
236 showing a BAC of 53.1% when applied to the DepressionDC sham arm and the DepressionDC sham  
237 model showing a BAC of 53.1% when applied to the DepressionDC tDCS arm.

238

239

240

241

242

243

244

245 **Table 1.** Baseline characteristics of patients with MADRS response and non-response to tDCS

| Feature                             | DepressionDC                       |                                |                      | ELECT                               |                                |                      |
|-------------------------------------|------------------------------------|--------------------------------|----------------------|-------------------------------------|--------------------------------|----------------------|
|                                     | Non-responder, n = 48 <sup>a</sup> | Responder, n = 24 <sup>a</sup> | p-value <sup>b</sup> | Non-responders, n = 39 <sup>a</sup> | Responder, n = 27 <sup>a</sup> | p-value <sup>b</sup> |
| Sex                                 |                                    |                                | 0.9                  |                                     |                                | 0.3                  |
| Female                              | 29 (60%)                           | 14 (58%)                       |                      | 25 (66%)                            | 21 (78%)                       |                      |
| Male                                | 19 (40%)                           | 10 (42%)                       |                      | 13 (34%)                            | 6 (22%)                        |                      |
| Age at randomization - years        | 37 (13)                            | 43 (14)                        | 0.1                  | 44 (13)                             | 47 (11)                        | 0.2                  |
| Age of depression onset - years     | 30 (13)                            | 37 (13)                        | <b>0.023</b>         | 27 (12)                             | 28 (12)                        | 0.8                  |
| Duration of episode - weeks         | 56 (67)                            | 52 (56)                        | >0.9                 | 28 (72)                             | 26 (33)                        | 0.7                  |
| Family history of depression        | 21 (46%)                           | 15 (65%)                       | 0.1                  | 26 (67%)                            | 19 (70%)                       | 0.8                  |
| Years of education                  | 11.91 (2.28)                       | 11.50 (1.65)                   | 0.5                  | 15.8 (4.5)                          | 14.0 (4.7)                     | 0.2                  |
| Unemployed                          | 3 (9.1%)                           | 0 (0%)                         | 0.5                  | 13 (35%)                            | 10 (37%)                       | 0.9                  |
| Married                             | 5 (15%)                            | 6 (43%)                        | 0.1                  | 19 (49%)                            | 16 (59%)                       | 0.4                  |
| Body mass index - kg/m <sup>2</sup> | 25.7 (5.2)                         | 27.9 (5.9)                     | 0.1                  | 25.8 (4.7)                          | 25.7 (4.6)                     | >0.9                 |
| Smoker                              | 21 (44%)                           | 7 (29%)                        | 0.2                  | 7 (18%)                             | 5 (19%)                        | >0.9                 |
| Hypertension                        | 4 (10%)                            | 4 (24%)                        | 0.2                  | 9 (24%)                             | 5 (19%)                        | 0.7                  |
| Diabetes                            | 1 (2.5%)                           | 0 (0%)                         | >0.9                 | 3 (7.9%)                            | 1 (3.7%)                       | 0.6                  |
| Hypothyroidism                      | 2 (5.0%)                           | 4 (24%)                        | 0.1                  | 8 (21%)                             | 5 (19%)                        | 0.8                  |
| MADRS score at baseline             | 26 (6)                             | 22 (5)                         | <b>0.049</b>         | 26 (6)                              | 29 (8)                         | <b>0.020</b>         |
| BDI score at baseline               | 30 (11)                            | 23 (9)                         | <b>0.011</b>         | 30 (10)                             | 30 (11)                        | 0.7                  |

246 <sup>a</sup>Mean (SD); n (%). <sup>b</sup> Pearson's Chi-squared test; Wilcoxon rank sum test. Fisher's exact test.

247 **Table 2.** Prediction results of MADRS response models.

| Model                 | TP | TN | FP | FN | Sens | Spec | PPV  | NPV  | PSI   | AUC  | BAC  | p-value      |
|-----------------------|----|----|----|----|------|------|------|------|-------|------|------|--------------|
| <b>DDC tDCS</b>       | 17 | 27 | 21 | 7  | 70.8 | 56.2 | 44.7 | 79.4 | 24.1  | 0.64 | 63.5 | <b>0.001</b> |
| applied to ELECT tDCS | 11 | 24 | 15 | 16 | 40.7 | 61.5 | 42.3 | 60.0 | 2.3   | 0.50 | 51.1 | -            |
| applied to DDC sham   | 17 | 17 | 15 | 15 | 53.1 | 53.1 | 53.1 | 53.1 | 6.2   | 0.62 | 53.1 | -            |
| <b>DDC sham</b>       | 20 | 20 | 12 | 12 | 62.5 | 62.5 | 62.5 | 62.5 | 25.0  | 0.67 | 62.5 | <b>0.023</b> |
| applied to ELECT sham | 9  | 14 | 16 | 5  | 64.3 | 46.7 | 36.0 | 73.7 | 9.7   | 0.59 | 55.5 | -            |
| applied to DDC tDCS   | 14 | 23 | 25 | 10 | 58.3 | 47.9 | 35.9 | 69.7 | 5.6   | 0.54 | 53.1 | -            |
| <b>ELECT tDCS</b>     | 17 | 23 | 16 | 10 | 63.0 | 59.0 | 51.5 | 69.7 | 21.2  | 0.60 | 61.0 | 0.07         |
| <b>ELECT sham</b>     | 5  | 15 | 15 | 9  | 35.7 | 50.0 | 25.0 | 62.5 | -12.5 | 0.44 | 42.9 | 0.88         |

248 Abbreviations: TP, True Positive; TN, True Negative; FP, False Positive; FN, False Negative; Sens, Sensitivity; Spec, Specificity; PPV, Positive Predictive Value; NPV,  
 249 Negative Predictive Value; PSI, Prognostic Summary Index; AUC, Area Under the Curve; BAC, Balanced Accuracy. Note: p-values were calculated using permutation  
 250 analysis ( $\alpha=0.05$ ; 1000 permutations).

251

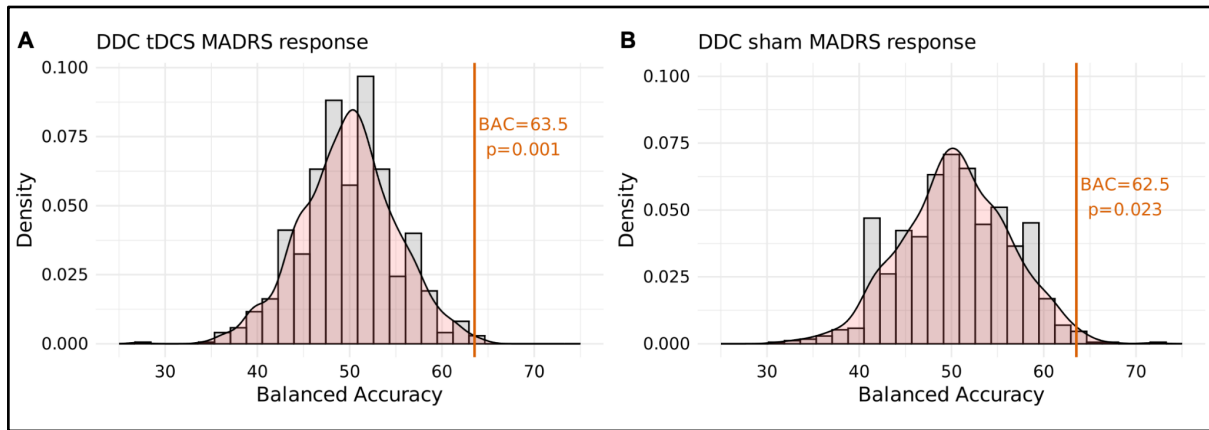

252

253 **Figure 2.** Permutation-based significance. Response was defined as  $\geq 50\%$  reduction from baseline.

254

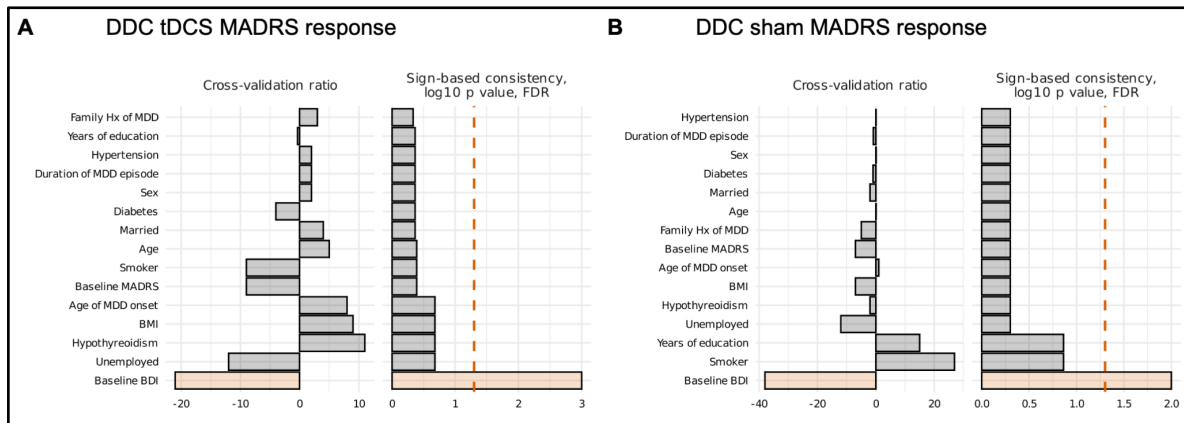

255

256 **Figure 3.** Feature importance. A positive cross-validation ratio suggests that a higher feature value predicts  
 257 MADRS response, whereas a negative ratio implies that lower values do. A higher sign-based consistency  
 258 suggests that feature weights were more consistently positive or negative across the ensemble. Significance was  
 259 assessed by defining a hypothesis test for the importance score with a null hypothesis of 0 and an alternative  
 260 hypothesis of not 0. FDR-corrected p-values were then calculated using a cumulative distribution function of z-  
 261 scores ( $\alpha=0.05$ ; red dotted line).

262

263 **Post-hoc clinical validation**

264 For the DepressionDC tDCS model, classification probabilities significantly predicted MADRS scores

265 at the 18-week follow-up visit ( $F_{(1,60)} = 4.53$ ,  $p_{FDR} = .037$ ,  $R^2 = 0.069$ ), but not MADRS scores at

266 week 30 or GAF scores at weeks 18 and 30 (Supplementary Table S2 and Supplementary Figure S1).

267 Classification probabilities of the DepressionDC sham model did not predict MADRS or GAF

268 outcomes at weeks 18 and 30.

269

## 270 Discussion

271 To our knowledge, this is the first study testing the cross-trial validity of ML models trained on easily  
272 attainable sociodemographic and clinical baseline variables to predict responders to a NIBS  
273 intervention. Whereas ML models increased accuracy in identifying responders to active tDCS and  
274 sham tDCS in the 6-week multicenter, randomized-controlled DepressionDC trial, the same variable  
275 battery could not be utilized to predict responses in the ELECT-TDCS trial, and models did not  
276 generalize across trial datasets and treatment modalities. Our findings underscore existing challenges  
277 and limitations inherent in predicting antidepressant responses in RCT populations.

278 The predictive accuracies of our models with above-chance detection rates align with prior  
279 attempts to predict responses to antidepressant medication using ML algorithms trained on clinical  
280 variables<sup>9,11,12,37</sup>. Although these performances are modest compared to the classification benchmarks  
281 set in other medical disciplines, such as neuroradiology<sup>38</sup>, antidepressant response prediction remains  
282 a challenging task relying on subjective judgment, and thus, even small increases in predictive  
283 accuracy might theoretically inform clinical decisions. However, as exemplified by the only prior  
284 attempt to prospectively assess the clinical utility of an antidepressant response classifier, which failed  
285 to improve treatment outcomes when applied as a decision-making tool<sup>14</sup>, strong indicators are needed  
286 to justify further development of classifiers beyond the proof-of-concept stage. In the context of our  
287 study, the tDCS response classifier for the DepressionDC sample significantly predicted depression  
288 severity at the 18-week follow-up visit, suggesting potential clinical validity. Nonetheless, given the  
289 failed external validation and the need for enhanced performance, further refinement and testing of the  
290 model would be needed to establish its efficacy and reliability<sup>39</sup>.

291 Recent research, including a validation attempt across trials on antipsychotic medication for  
292 schizophrenia<sup>40</sup>, suggests that three main reasons might have contributed to our models' failed  
293 transferability across trial datasets. First, trial populations might have been too heterogeneous,  
294 including patients at different disorder stages or with nuanced differences in psychopathology profiles  
295 not captured by the broad DSM-5 inclusion criteria. Indeed, participants in the DepressionDC trial  
296 showed numerically later depression onset and longer mean depression episode duration compared to

297 ELECT-TDCS<sup>16,18</sup>. By contrast, baseline depression severity was comparable between trials. Second,  
298 compared to a previous ML prediction study in the ELECT-TDCS cohort<sup>23</sup>, our models showed  
299 considerably lower predictive performance in the same dataset. Since our analysis aimed to develop  
300 generalizable prediction models across two RCT cohorts, we took several methodological choices that  
301 may partly explain this difference. Instead of an XGBoost classifier, we used a validated ensemble  
302 learning strategy applying SVM algorithms within a nested cross-validation framework. This  
303 framework was chosen because it has been applied in several multisite analyses and optimized to  
304 generate generalizable models<sup>9,27,28</sup>. We also limited the input variables to features available in both  
305 datasets. Consequently, this meant omitting data modalities like neuropsychological test results,  
306 electrophysiological data, and imaging measurements, which might have been needed to specifically  
307 detect patterns of response in the active treatment arm. For example, a recent analysis on data from  
308 the RESIS trial, which like the DepressionDC trial was also negative regarding its primary and  
309 secondary outcomes, extended a previous attempt to build an active rTMS treatment response  
310 classifier for patients with predominant negative-symptom schizophrenia based on structural  
311 Magnetic Resonance Imaging (sMRI)<sup>9</sup> by incorporating further data domains (i.e. polygenic risk  
312 scores) and multimodal sequential modelling<sup>10</sup>. While not yet validated, this approach improved the  
313 prediction performance from 80 % to 94% in the active treatment but not the sham treatment arm.  
314 Third, treatment response rates could have been overly influenced by contextual factors that cannot be  
315 modeled at the single-subject level. For example, the present trials were conducted in healthcare  
316 settings with differing models of reimbursement and access to care. They also subtly differed in  
317 eligibility criteria, with participants in the DepressionDC trial kept on a stable SSRI dose while  
318 participants in ELECT-TDCS were antidepressant-free. These methodological challenges showcase  
319 the current need in ML-based treatment prediction research to systematically assess and compare  
320 potential analytic pipelines in larger samples, to include comprehensive phenotyping in RCT  
321 protocols, and to harmonize best-practice symptom assessments across brain stimulation trials.

322 Models with above-chance detection rates for active tDCS and sham tDCS in the  
323 DepressionDC sample also did not generalize across treatment modalities. Our feature importance  
324 analyses indicated that the performance of both models was predominantly driven by baseline BDI

325 scores. This reliance on a single feature presents an interpretative challenge: Without a distinct feature  
326 selection profile, it becomes difficult to determine whether the models are tailored specifically to each  
327 treatment modality or if they lack generalizability to new patients.

328 Our analysis has several limitations. Firstly, the relatively small sample size in both datasets  
329 might have limited the performance and robustness of our classifiers<sup>41</sup>. Secondly, only a limited set of  
330 identical features was available from both trials. For example, negative affect, which was a key  
331 predictive feature in the prior ML analysis of the ELECT-TDCS sample<sup>23</sup>, was not collected in  
332 DepressionDC. This omission might have reduced the predictive accuracy of models in the present  
333 analysis. Thirdly, our study was retrospective and served as a proof-of-concept analysis.

334 Consequently, our models have not been validated prospectively, nor have they been benchmarked  
335 against clinical judgments. Fourthly, the DepressionDC trial did not demonstrate the efficacy of active  
336 tDCS at a group level. This raises the possibility that there may not have been any discernible effects  
337 at the individual subject level either, which would inherently limit the potential of our models to  
338 identify specific treatment effects. Lastly, while Kambeitz et al.<sup>23</sup> evaluated treatment response at  
339 week 10, we opted to identify responders at week 6 due to the availability of MADRS data at this time  
340 point across both trials. Consequently, our study could not explore and compare predictive accuracies  
341 at various endpoints.

342 In conclusion, our findings suggest that readily accessible clinical variables at baseline,  
343 particularly self-rated depression severity, have the potential to identify responders to active tDCS and  
344 sham tDCS treatments in patients with MDD. However, our findings also caution against the  
345 premature dissemination of predictive models that lack external validation. Future research should  
346 aim to harmonize and deepen phenotyping efforts in RCT protocols to enable the development of  
347 more robust predictive models. Ultimately, such models need to be first externally validated and then  
348 prospectively tested for their clinical utility.

349



## 350 **Acknowledgements**

351 This research was funded by grant 01EE1403E within the German Center for Brain Stimulation  
352 research consortium by the German Federal Ministry of Education and Research and supported within  
353 the initial phase of the German Center for Mental Health (Deutsches Zentrum für Psychische  
354 Gesundheit [DZPG], grant 01EE2303A). GB was supported by two internal grants for young  
355 researchers from the Medical Faculty of LMU Munich (FöFoLe, grant number 1127; FöFoLe+, grant  
356 number CS063). JW was supported by an internal grant for young researchers from the Medical  
357 Faculty of LMU Munich (FöFoLe, grant number 1150).

## 358 **Conflict of Interest**

359 GB, SG, LB, ED, DK, UV, KW, JW, AF, CN, PZ, TK, CS, NK and AB have no competing interests  
360 to declare. CP has received grants from the German Federal Ministry of Education and Research  
361 (01KG2003, 01EE1407H, and 01EE1403D) and the Deutsche Forschungsgemeinschaft (PL 525/4-1,  
362 PL 525/6-1, and PL 525/6-1) and holds stock options for PsyKit (Tübingen, Germany). BL has  
363 received grants from Bayhost, the EU (European School for Interdisciplinary Tinnitus Research  
364 [722046] and the Unification of Treatments and Interventions for Tinnitus Patients [848261]), and  
365 Neuromod; consulting fees from Neuromod, Decibel Therapeutics, Schwabe, Rovi, Sound  
366 Therapeutics, Sonovam, and Sea Pharma; payments from Schwabe, Neuromod, and Desyncra for  
367 lectures; payments from Schwabe for expert testimony; has a pending patent for neuronavigated  
368 transcranial magnetic stimulation coil positioning for the treatment of tinnitus; participated on a data  
369 safety monitoring board or advisory board for the Technical University of Munich (Necstim) and  
370 Neuromod (TENT A2, TENT A3); has a chair on the executive committee of the German Society for  
371 Brain Stimulation in Psychiatry and has a fiduciary role in the Tinnitus Research Initiative; has stock  
372 or stock options from Sea Pharma; and has received free rental equipment from Magventure, Deymed,  
373 and Necstim. LF has received author royalties for book chapters from Wiley-Blackwell, Georg  
374 Thieme Verlag, Urban & Fischer Verlag, and Elsevier; and payments for classes from the German  
375 Sleep Society, the European Sleep Research Society, and Medical Association Freiburg. DK has

376 received a grant from the Manfred-Strohscheer Foundation for the Activity of Cerebral Networks,  
377 Amyloid and Microglia in Alzheimer's Disease (ActiGliA) project and has received travel and hotel  
378 expenses for an invited talk from the EU-funded Stimulation in Pediatrics project. MB has received  
379 consulting fees from Parexel and Bayer and payments for lectures from Johnson & Johnson. LF has  
380 received author royalties for book chapters from Wiley-Blackwell, Georg Thieme Verlag, Urban &  
381 Fischer Verlag, and Elsevier; and payments for classes from the German Sleep Society, the European  
382 Sleep Research Society, and Medical Association Freiburg. FP has received grants from the German  
383 Research Foundation (BR 4264/6-1) and the German Federal Ministry of Education and Research  
384 (01EW1903); consulting fees from Brainsway (Jerusalem, Israel) as a member of the European  
385 Scientific Advisory Board and from Sooma (Helsinki, Finland) as a member of the International  
386 Scientific Advisory Board; honoraria for workshops from Mag&More (Munich, Germany) and  
387 honoraria for lectures from the NeuroCare Group and Brainsway; and has received equipment from  
388 Mag&More, the NeuroCare Group, and Brainsway.

## 389 **References**

- 390 1 Institute of Health Metrics and Evaluation. Global Health Data Exchange (GHDx).  
391 2022.[http://ghdx.healthdata.org/gbd-results-tool?params=gbd-api-2019-](http://ghdx.healthdata.org/gbd-results-tool?params=gbd-api-2019-permalink/d780dffbe8a381b25e1416884959e88b)  
392 [permalink/d780dffbe8a381b25e1416884959e88b](http://ghdx.healthdata.org/gbd-results-tool?params=gbd-api-2019-permalink/d780dffbe8a381b25e1416884959e88b).
- 393 2 Rush AJ, Trivedi MH, Wisniewski SR, Stewart JW, Nierenberg AA, Thase ME *et al*. Bupropion-  
394 SR, Sertraline, or Venlafaxine-XR after Failure of SSRIs for Depression. *N Engl J Med* 2006;  
395 **354**: 1231–1242.
- 396 3 Fried EI, Nesse RM. Depression is not a consistent syndrome: An investigation of unique  
397 symptom patterns in the STAR\*D study. *Journal of Affective Disorders* 2015; **172**: 96–102.
- 398 4 Monroe SM, Harkness KL. Major Depression and Its Recurrences: Life Course Matters. *Annu*  
399 *Rev Clin Psychol* 2022; **18**: 329–357.
- 400 5 Border R, Johnson EC, Evans LM, Smolen A, Berley N, Sullivan PF *et al*. No Support for  
401 Historical Candidate Gene or Candidate Gene-by-Interaction Hypotheses for Major Depression  
402 Across Multiple Large Samples. *Am J Psychiatry* 2019; **176**: 376–387.
- 403 6 Schmaal L, Pozzi E, C. Ho T, van Velzen LS, Veer IM, Opel N *et al*. ENIGMA MDD: seven  
404 years of global neuroimaging studies of major depression through worldwide data sharing. *Transl*  
405 *Psychiatry* 2020; **10**: 172.
- 406 7 Perlman K, Benrimoh D, Israel S, Rollins C, Brown E, Tunteng J-F *et al*. A systematic meta-  
407 review of predictors of antidepressant treatment outcome in major depressive disorder. *Journal of*  
408 *Affective Disorders* 2019; **243**: 503–515.

- 409 8 Chekroud AM, Zotti RJ, Shehzad Z, Gueorguieva R, Johnson MK, Trivedi MH *et al.* Cross-trial  
410 prediction of treatment outcome in depression: a machine learning approach. *The Lancet*  
411 *Psychiatry* 2016; **3**: 243–250.
- 412 9 Koutsouleris N, Wobrock T, Guse B, Langguth B, Landgrebe M, Eichhammer P *et al.* Predicting  
413 Response to Repetitive Transcranial Magnetic Stimulation in Patients With Schizophrenia Using  
414 Structural Magnetic Resonance Imaging: A Multisite Machine Learning Analysis. *Schizophrenia*  
415 *Bulletin* 2018; **44**: 1021–1034.
- 416 10 Dong MS, Rokicki J, Dwyer D, Papiol S, Streit F, Rietschel M *et al.* Multimodal workflows  
417 optimally predict response to repetitive transcranial magnetic stimulation in patients with  
418 schizophrenia: a multisite machine learning analysis. *Transl Psychiatry* 2024; **14**: 196.
- 419 11 Nie Z, Vairavan S, Narayan VA, Ye J, Li QS. Predictive modeling of treatment resistant  
420 depression using data from STAR\*D and an independent clinical study. *PLoS One* 2018; **13**:  
421 e0197268.
- 422 12 Nunez J-J, Nguyen TT, Zhou Y, Cao B, Ng RT, Chen J *et al.* Replication of machine learning  
423 methods to predict treatment outcome with antidepressant medications in patients with major  
424 depressive disorder from STAR\*D and CAN-BIND-1. *PLoS One* 2021; **16**: e0253023.
- 425 13 Meehan AJ, Lewis SJ, Fazel S, Fusar-Poli P, Steyerberg EW, Stahl D *et al.* Clinical prediction  
426 models in psychiatry: a systematic review of two decades of progress and challenges. *Mol*  
427 *Psychiatry* 2022; **27**: 2700–2708.
- 428 14 Browning M, Bilderbeck AC, Dias R, Dourish CT, Kingslake J, Deckert J *et al.* The clinical  
429 effectiveness of using a predictive algorithm to guide antidepressant treatment in primary care  
430 (PReDicT): an open-label, randomised controlled trial. *Neuropsychopharmacol* 2021; **46**: 1307–  
431 1314.
- 432 15 Brunoni AR, Valiengo L, Baccaro A, Zanão TA, de Oliveira JF, Goulart A *et al.* The Sertraline vs  
433 Electrical Current Therapy for Treating Depression Clinical Study: Results From a Factorial,  
434 Randomized, Controlled Trial. *JAMA Psychiatry* 2013; **70**: 383.
- 435 16 Brunoni AR, Moffa AH, Sampaio-Junior B, Borriero L, Moreno ML, Fernandes RA *et al.* Trial  
436 of Electrical Direct-Current Therapy versus Escitalopram for Depression. *N Engl J Med* 2017;  
437 **376**: 2523–2533.
- 438 17 Razza LB, Palumbo P, Moffa AH, Carvalho AF, Solmi M, Loo CK *et al.* A systematic review  
439 and meta-analysis on the effects of transcranial direct current stimulation in depressive episodes.  
440 *Depress Anxiety* 2020; **37**: 594–608.
- 441 18 Burkhardt G, Kumpf U, Crispin A, Goerigk S, Andre E, Plewnia C *et al.* Transcranial direct  
442 current stimulation as an additional treatment to selective serotonin reuptake inhibitors in adults  
443 with major depressive disorder in Germany (DepressionDC): a triple-blind, randomised, sham-  
444 controlled, multicentre trial. *Lancet*  
445 2023. [https://www.thelancet.com/journals/lancet/article/PIIS0140-6736\(23\)00640-2/fulltext](https://www.thelancet.com/journals/lancet/article/PIIS0140-6736(23)00640-2/fulltext).
- 446 19 Borriero L, Cavendish BA, Aparicio LVM, Luethi MS, Goerigk S, Carneiro AM *et al.* Home-  
447 Use Transcranial Direct Current Stimulation for the Treatment of a Major Depressive Episode: A  
448 Randomized Clinical Trial. *JAMA Psychiatry* 2024. doi:10.1001/jamapsychiatry.2023.4948.
- 449 20 Woodham RD, Selvaraj S, Lajmi N, Hobday H, Sheehan G, Ghazi-Noori A-R *et al.* Home-based  
450 transcranial direct current stimulation RCT in major depression. bioRxiv. 2023.  
451 doi:10.1101/2023.11.27.23299059.

- 452 21 Padberg F, Bulubas L, Mizutani-Tiebel Y, Burkhardt G, Kranz GS, Koutsouleris N *et al.* The  
453 intervention, the patient and the illness – Personalizing non-invasive brain stimulation in  
454 psychiatry. *Experimental Neurology* 2021; **341**: 113713.
- 455 22 Burkhardt G, Goerigk S, Padberg F. Mood Disorders: Predictors of tDCS Response. In: Brunoni  
456 AR, Nitsche MA, Loo CK (eds). *Transcranial Direct Current Stimulation in Neuropsychiatric*  
457 *Disorders: Clinical Principles and Management*. Springer International Publishing: Cham, 2021,  
458 pp 481–490.
- 459 23 Kambeitz J, Goerigk S, Gattaz W, Falkai P, Benseñor IM, Lotufo PA *et al.* Clinical patterns  
460 differentially predict response to transcranial direct current stimulation (tDCS) and escitalopram  
461 in major depression: A machine learning analysis of the ELECT-TDCS study. *Journal of*  
462 *Affective Disorders* 2020; **265**: 460–467.
- 463 24 Seibt O, Brunoni AR, Huang Y, Bikson M. The Pursuit of DLPFC: Non-neuronavigated Methods  
464 to Target the Left Dorsolateral Pre-frontal Cortex With Symmetric Bicephalic Transcranial Direct  
465 Current Stimulation (tDCS). *Brain Stimul* 2015; **8**: 590–602.
- 466 25 Montgomery SA, Åsberg M. A New Depression Scale Designed to be Sensitive to Change. *Br J*  
467 *Psychiatry* 1979; **134**: 382–389.
- 468 26 Troyanskaya O, Cantor M, Sherlock G, Brown P, Hastie T, Tibshirani R *et al.* Missing value  
469 estimation methods for DNA microarrays. *Bioinformatics* 2001; **17**: 520–525.
- 470 27 Burkhardt G, Adorjan K, Kambeitz J, Kambeitz-Illankovic L, Falkai P, Eyer F *et al.* A machine  
471 learning approach to risk assessment for alcohol withdrawal syndrome. *European*  
472 *Neuropsychopharmacology* 2020; **35**: 61–70.
- 473 28 Koutsouleris N, Dwyer DB, Degenhardt F, Maj C, Urquijo-Castro MF, Sanfelici R *et al.*  
474 Multimodal Machine Learning Workflows for Prediction of Psychosis in Patients With Clinical  
475 High-Risk Syndromes and Recent-Onset Depression. *JAMA Psychiatry* 2021; **78**: 195–209.
- 476 29 Chang C-C, Lin C-J. LIBSVM: A library for support vector machines. *ACM Trans Intell Syst*  
477 *Technol* 2011; **2**: 1–27.
- 478 30 Brodersen KH, Ong CS, Stephan KE, Buhmann JM. The Balanced Accuracy and Its Posterior  
479 Distribution. 2010, pp 3121–3124.
- 480 31 Huang Y-M, Du S-X. Weighted support vector machine for classification with uneven training  
481 class sizes. 2005, pp 4365-4369 Vol. 7.
- 482 32 Golland P, Fischl B. Permutation tests for classification: towards statistical significance in image-  
483 based studies. *Inf Process Med Imaging* 2003; **18**: 330–341.
- 484 33 Koutsouleris N, Kambeitz-Illankovic L, Ruhrmann S, Rosen M, Ruef A, Dwyer DB *et al.*  
485 Prediction Models of Functional Outcomes for Individuals in the Clinical High-Risk State for  
486 Psychosis or With Recent-Onset Depression: A Multimodal, Multisite Machine Learning  
487 Analysis. *JAMA Psychiatry* 2018; **75**: 1156–1172.
- 488 34 Gómez-Verdejo V, Parrado-Hernández E, Tohka J, Alzheimer’s Disease Neuroimaging Initiative.  
489 Sign-Consistency Based Variable Importance for Machine Learning in Brain Imaging.  
490 *Neuroinformatics* 2019; **17**: 593–609.
- 491 35 R. Team. R: A language and environment for statistical computing. *MSOR connections* 2014;  
492 **1**.<https://apps.dtic.mil/sti/citations/AD1039033>.

- 493 36 Bates D, Mächler M, Bolker B, Walker S. Fitting linear mixed-effects models using lme4. *arXiv*  
494 *preprint arXiv:14065823* 2014.<http://arxiv.org/abs/1406.5823>.
- 495 37 Browning M, Kingslake J, Dourish CT, Goodwin GM, Harmer CJ, Dawson GR. Predicting  
496 treatment response to antidepressant medication using early changes in emotional processing.  
497 *European Neuropsychopharmacology* 2019; **29**: 66–75.
- 498 38 Wagner DT, Tilmans L, Peng K, Niedermeier M, Rohl M, Ryan S *et al*. Artificial Intelligence in  
499 Neuroradiology: A Review of Current Topics and Competition Challenges. *Diagnostics (Basel)*  
500 2023; **13**. doi:10.3390/diagnostics13162670.
- 501 39 Bzdok D, Meyer-Lindenberg A. Machine Learning for Precision Psychiatry: Opportunities and  
502 Challenges. *Biol Psychiatry Cogn Neurosci Neuroimaging* 2018; **3**: 223–230.
- 503 40 Chekroud AM, Hawrilenko M, Loho H, Bondar J, Gueorguieva R, Hasan A *et al*. Illusory  
504 generalizability of clinical prediction models. *Science* 2024; **383**: 164–167.
- 505 41 van der Ploeg T, Austin PC, Steyerberg EW. Modern modelling techniques are data hungry: a  
506 simulation study for predicting dichotomous endpoints. *BMC Med Res Methodol* 2014; **14**: 137.
- 507  
508  
509  
510  
511  
512  
513  
514  
515  
516  
517  
518  
519  
520  
521  
522  
523  
524  
525  
526  
527  
528  
529
